# Supplementary material for: pH-Responsive smart non-woven fabrics (NWFs) with double switchable wettability between superhydrophilicity–superhydrophobicity–superhydrophilicity to oil/water separation
Source: Royal Society of Chemistry journal article supplement (doi:10.1039/c9nj00409b), 2019-01-01
Supplement: c9nj00409b1.pdf [file c9nj00409b1.pdf]

### Supporting materials

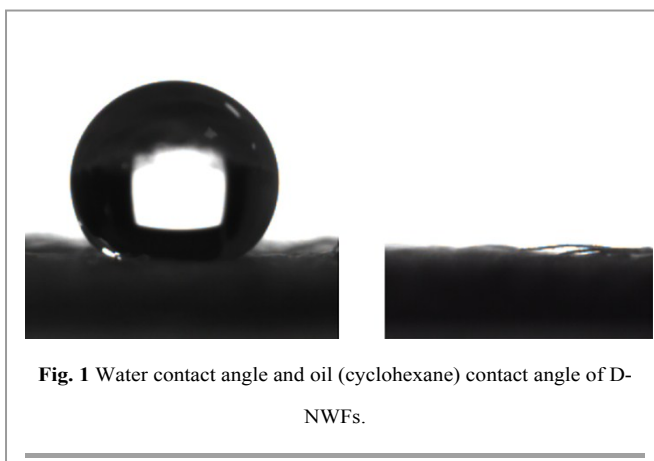

Fig. 1 is the water contact angle (WCA) and oil contact angle (OCA, cyclohexane) images of D-NWFs.

From Fig.1, the water contact angle of D-NWFs at neutral condition is  $151^\circ$ , and the oil droplet completely spread into D-NWFs with oil contact angle is  $0^\circ$ . These exhibit superhydrophobic and superoleophilic properties of D-NWFs.

Fig. 2 is the illustration of the transformation of surface wettability in response to different pH conditions after modification with a mixed monolayer of  $\text{HS}(\text{CH}_2)_{10}\text{CH}_3$  and  $\text{HS}(\text{CH}_2)_{10}\text{COOH}$ . Same as the mechanism of SO-NWFs fabrication, when a basic water droplet dropped on SC-NWFs, the carboxyl groups are deprotonated to  $-\text{COO}^-$  and negatively charged which results in superhydrophilicity. While dropping acidic water droplet on the NWFs, the  $-\text{COO}^-$  are protonated to  $-\text{COOH}$ , and the methyl group plays a dominant role, resulting to hydrophobicity. Fig. 3 is the water contact angle curves with pH change. The optimistic  $X_{\text{COOH}}$  is 0.55, and the wettability of SC-NWFs changes from superhydrophobicity to superhydrophilicity with an increase of pH. From above discussions, both two thiols can be used in the preparation of single pH-responsive switchable smart NWFs.

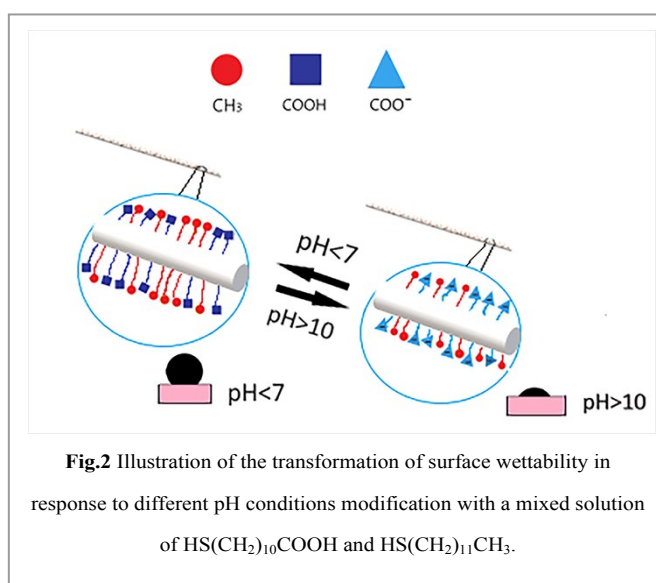

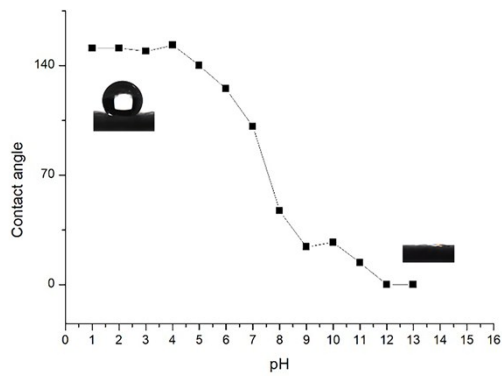

**Fig.3** Water contact angle as a function of pH on NWFs that had been modified with a mixed solution of 55%  $\text{HS}(\text{CH}_2)_{10}\text{COOH}$  and 45%  $\text{HS}(\text{CH}_2)_{11}\text{CH}_3$ .
